# Supplementary material for: Detection of resistance mutations in patients with anaplastic lymphoma kinase-rearranged lung cancer through liquid biopsy
Source: PubMed Central journal article supplement — Transl Lung Cancer Res. 2023 Jul 20;12(7):1445–53. doi: 10.21037/tlcr-22-671 (PMC10413038; doi:10.21037/tlcr-22-671), 2023-07-20
Supplement: tlcr-12-07-1445-dss.pdf [file tlcr-12-07-1445-dss.pdf]

## Data Sharing Statement

|                     |                                                                                                                                                    |                                                                                                                                                                                                                       |
|---------------------|----------------------------------------------------------------------------------------------------------------------------------------------------|-----------------------------------------------------------------------------------------------------------------------------------------------------------------------------------------------------------------------|
| <b>Article Info</b> | <a href="https://dx.doi.org/10.21037/tlcr-22-671">https://dx.doi.org/10.21037/tlcr-22-671</a>                                                      |                                                                                                                                                                                                                       |
| <b>Item</b>         | <b>Question</b>                                                                                                                                    | <b>Authors' Response<br/>(place "-" if not applicable)</b>                                                                                                                                                            |
| 1                   | Would you like to share data collected for your study to others?                                                                                   | Yes.                                                                                                                                                                                                                  |
| 2                   | If not, would you like to share the reason for your decision?                                                                                      | N/A                                                                                                                                                                                                                   |
| 3                   | What data in particular will be shared?                                                                                                            | Digital PCR data.                                                                                                                                                                                                     |
| 4                   | Any other documents will be share? Such as study protocol, statistical analysis plan, informed consent form, clinical study report, analytic code. | Protocol.                                                                                                                                                                                                             |
| 5                   | When will data availability begin?                                                                                                                 | From the date the paper is published.                                                                                                                                                                                 |
| 6                   | When will data availability end?                                                                                                                   | One year after the date the paper is published.                                                                                                                                                                       |
| 7                   | To whom will you share the data?                                                                                                                   | Those who have clearly stated the purpose of the research and obtained the author's consent.                                                                                                                          |
| 8                   | For what type of analysis or purpose?                                                                                                              | Only if the purpose of the analysis is presented and accepted by the authors.                                                                                                                                         |
| 9                   | How or where can the data/documents be obtained?                                                                                                   | The datasets used and/or analyzed in the current study are available from the corresponding author (e-mail: <a href="mailto:takaaki6@asahikawa-med.ac.jp">takaaki6@asahikawa-med.ac.jp</a> ) upon reasonable request. |
| 10                  | Any other restrictions?                                                                                                                            | N/A                                                                                                                                                                                                                   |
