# Supplementary material for: Detection of resistance mutations in patients with anaplastic lymphoma kinase-rearranged lung cancer through liquid biopsy
Source: PubMed Central journal article supplement — Transl Lung Cancer Res. 2023 Jul 20;12(7):1445–53. doi: 10.21037/tlcr-22-671 (PMC10413038; doi:10.21037/tlcr-22-671), 2023-07-20
Supplement: tlcr-12-07-1445-supplementary.pdf [file tlcr-12-07-1445-supplementary.pdf]

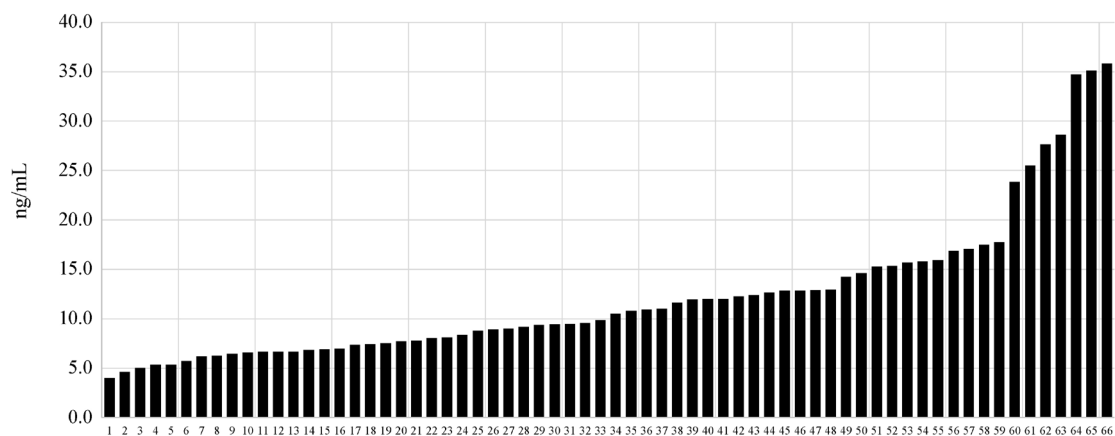

Figure S1 Concentration of cfDNA in plasma samples. cfDNA, cell-free DNA.

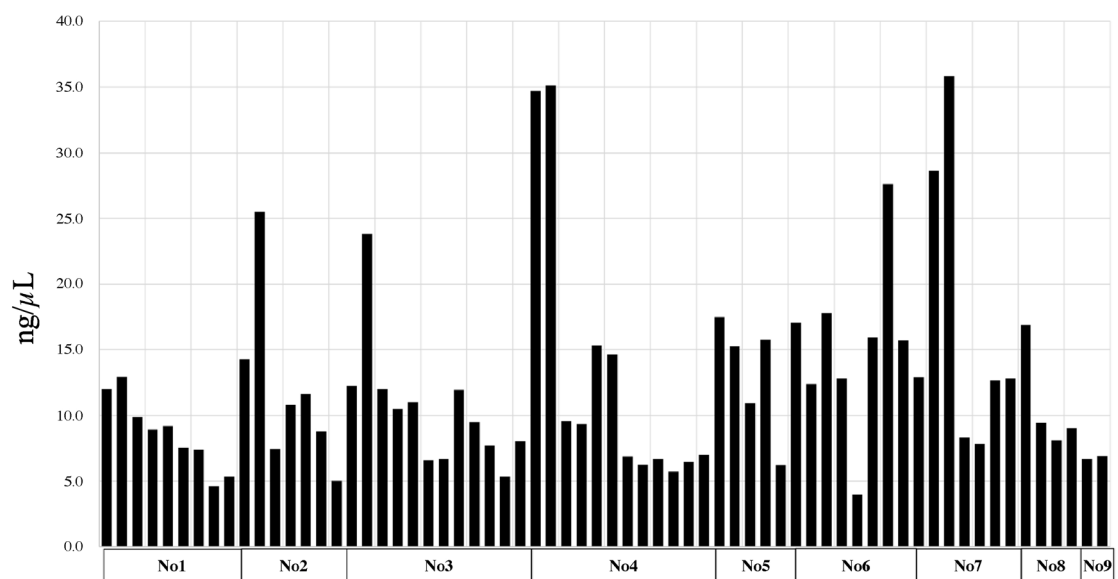

Figure S2 Concentration of cfDNA in plasma samples by patient. cfDNA, cell-free DNA.

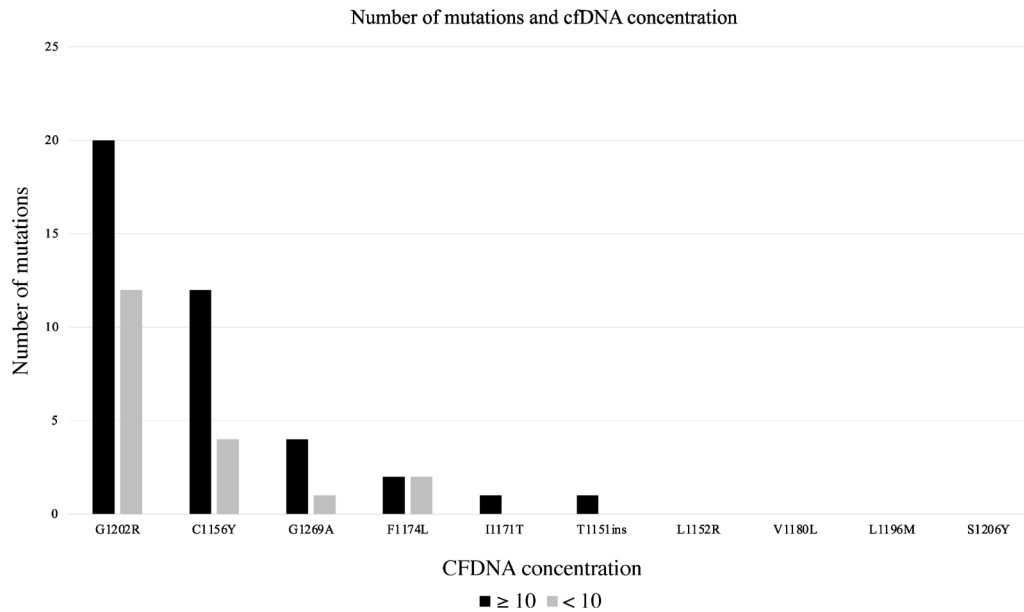

**Figure S3** Number of mutations and cfDNA concentration. cfDNA, cell-free DNA.

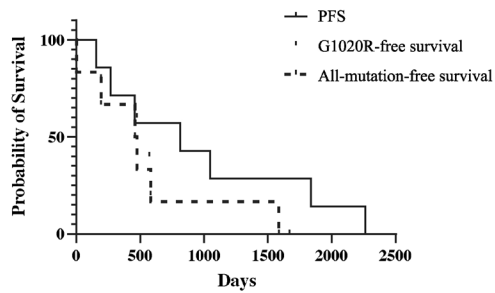

**Figure S4** PFS and resistant mutation-free survival. PFS, progression-free survival.

**Table S1** Details of the probes used for droplet digital polymerase chain reaction

| Probes                            | Vendor                        | No.  | Lot No. | ALK mutations                    |
|-----------------------------------|-------------------------------|------|---------|----------------------------------|
| LBx <sup>®</sup> Probe ALK Multi1 | Riken Genesis Co., Ltd. Japan | A089 | A10005  | T1151ins, C1156Y, L1196M, G1269A |
| LBx <sup>®</sup> Probe ALK Multi2 | Riken Genesis Co., Ltd. Japan | A090 | A10003  | L1152R, F1174L, V1180L           |
| LBx <sup>®</sup> Probe ALK Multi3 | Riken Genesis Co., Ltd. Japan | A091 | A10003  | I1171T, G1202R, S1206Y           |

ALK, anaplastic lymphoma kinase.

**Table S2** Composition of the reaction mixture for the ddPCR

| Component                            | Volume      |
|--------------------------------------|-------------|
| 2×ddPCR Supermix for Probe (No dUTP) | 11 $\mu$ L  |
| Probes                               | 2.2 $\mu$ L |
| cfDNA diluent                        | 8.8 $\mu$ L |
| Total                                | 22 $\mu$ L  |

ddPCR, droplet digital polymerase chain reaction; dUTP, deoxyuridine triphosphate; cfDNA, cell-free DNA.

**Table S3** Cycling conditions for droplet digital polymerase chain reaction

| Cycling step        | Temperature ( $^{\circ}$ C) | Time     | Ramp rate        | Cycle |
|---------------------|-----------------------------|----------|------------------|-------|
| Enzyme activation   | 95                          | 10 min   | 2 $^{\circ}$ C/s | 1     |
| Denaturation        | 94                          | 30 s     |                  | 40    |
| Annealing/extension | 58                          | 1 min    |                  |       |
| Enzyme deactivation | 98                          | 10 min   |                  | 1     |
| Hold                | 4                           | Infinite |                  | 1     |
